# Supplementary material for: Enhancing the electrostatic potential difference of high entropy perovskite fluorides by ligand modification for promoted dynamic reconstruction
Source: Royal Society of Chemistry journal article supplement (doi:10.1039/d3ta04381a), 2023-01-01
Supplement: d3ta04381a1.pdf [file d3ta04381a1.pdf]

## *Supporting Information*

### **Enhancing Electrostatic Potential Difference of High Entropy Perovskite Fluorides by Ligand Modification for Promoted Dynamic Reconstruction**

Zeyu Hao<sup>a,1</sup>, Zhengyan Du<sup>a,1</sup>, Ting Deng<sup>a</sup>, Dong Wang<sup>a</sup>, Yi Zeng<sup>a</sup>, Shansheng Yu<sup>a</sup>,  
Zeshuo Meng<sup>a,\*</sup>, Xiaoying Hu<sup>b,\*</sup>, Xiufeng Hao<sup>c,\*</sup>, Hongwei Tian<sup>a,\*</sup>

<sup>a</sup> Key Laboratory of Automobile Materials of MOE and School of Materials Science and Engineering, Jilin University, Changchun, 130012, China

<sup>b</sup> College of Science and Laboratory of Materials Design and Quantum Simulation, Changchun University, Changchun 130022, China

<sup>c</sup> Department of Polymer Science, College of Chemistry, Jilin University, Changchun 130012, China

E-mail: [mengzs21@mails.jlu.edu.cn](mailto:mengzs21@mails.jlu.edu.cn) (Z.S. Meng); [huxy@ccu.edu.cn](mailto:huxy@ccu.edu.cn) (X.Y. Hu);  
[haoxf@jlu.edu.cn](mailto:haoxf@jlu.edu.cn) (X.F. Hao); [tianhw@jlu.edu.cn](mailto:tianhw@jlu.edu.cn) (H.W. Tian).

<sup>1</sup> These authors contributed equally to this work.

**Figure S1** SEM images of (a-b) HEPF, (c-d) HEPF-100, (e-f) HEPF-200, and (g-h) FNS-300.

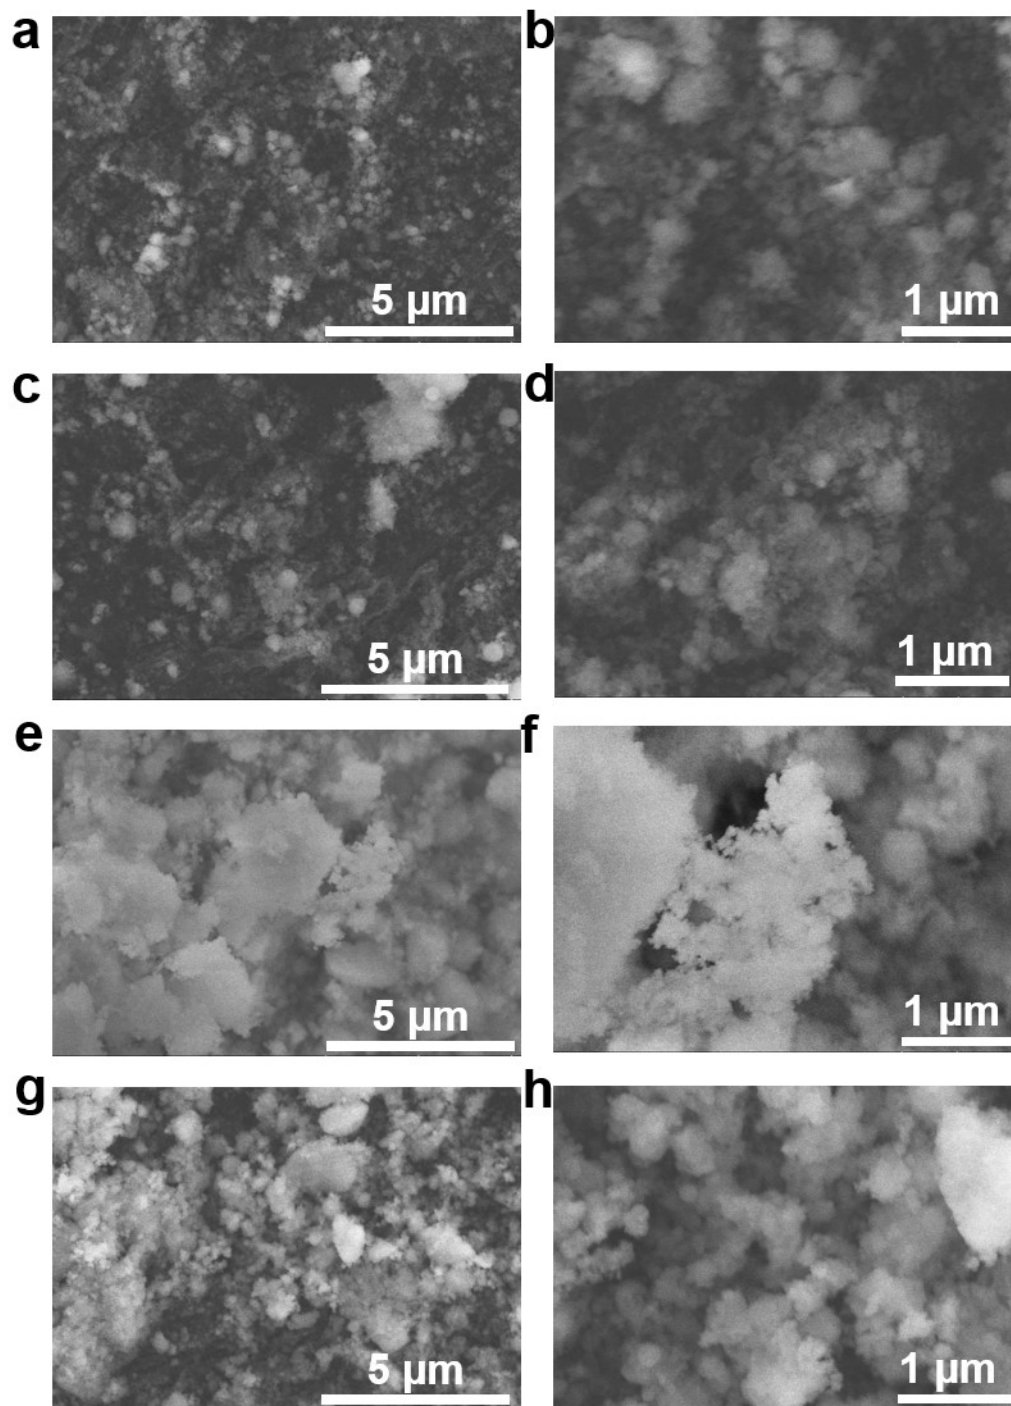

**Figure S2** SEM energy dispersive spectrum (EDS) mappings of HEPF.

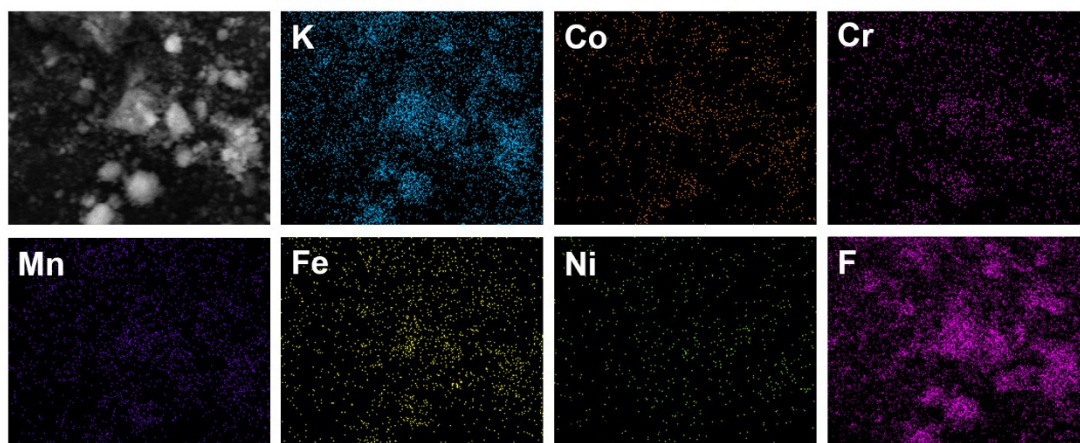

**Figure S3** EDS mappings of HEPF-100.

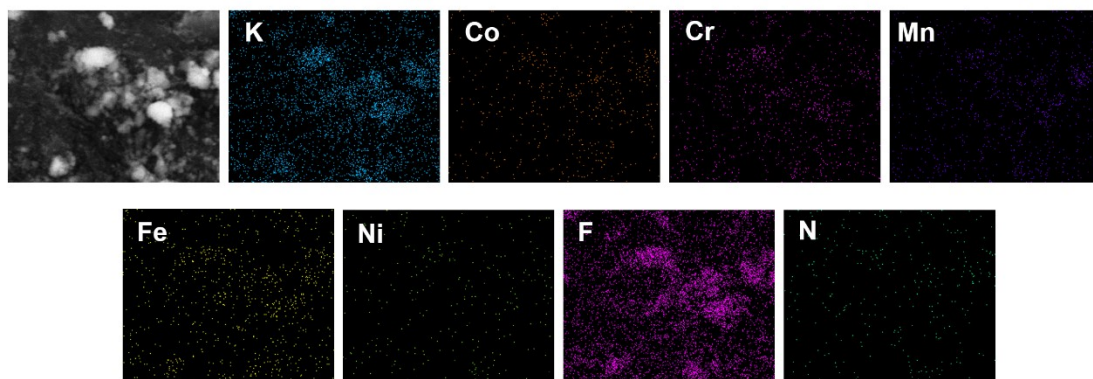

**Figure S4** EDS mappings of HEPF-200.

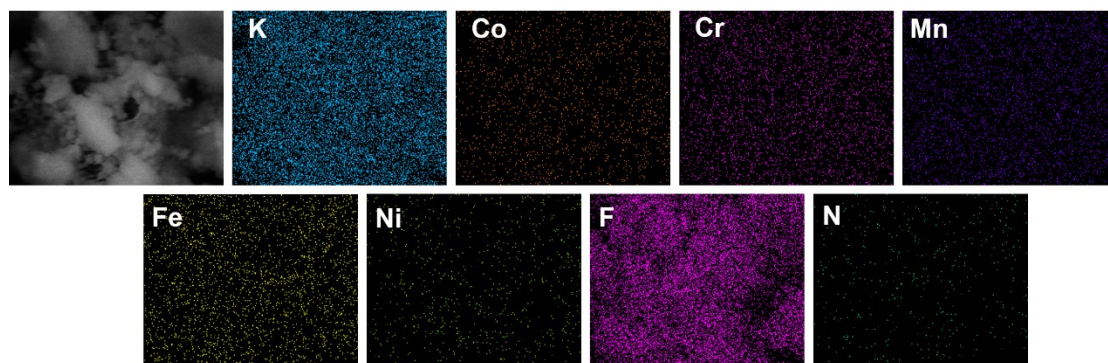

**Figure S5** EDS mappings of HEPF-300.

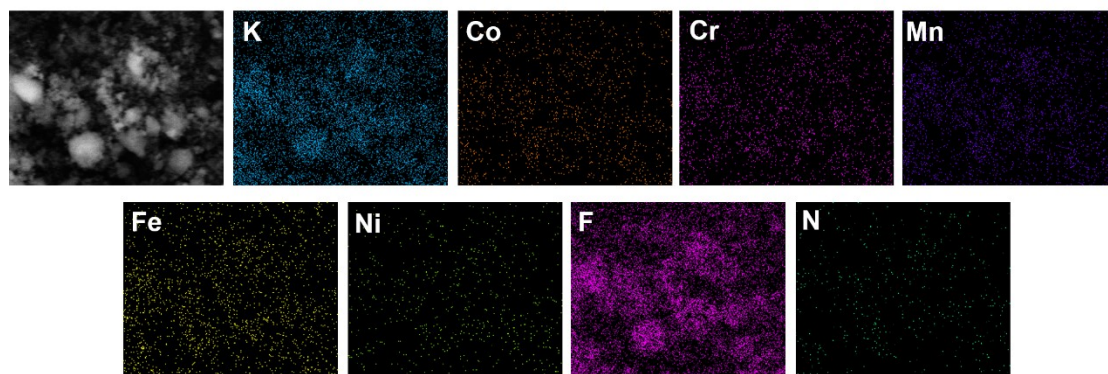

**Figure S6** N<sub>2</sub> adsorption-desorption isotherms of (a) HEPF, (b) HEPF-100, (c) HEPF-200, and (d) HEPF-300. The corresponding pore size distributions of (e) HEPF, (f) HEPF-100, (g) HEPF-200, and (h) HEPF-300.

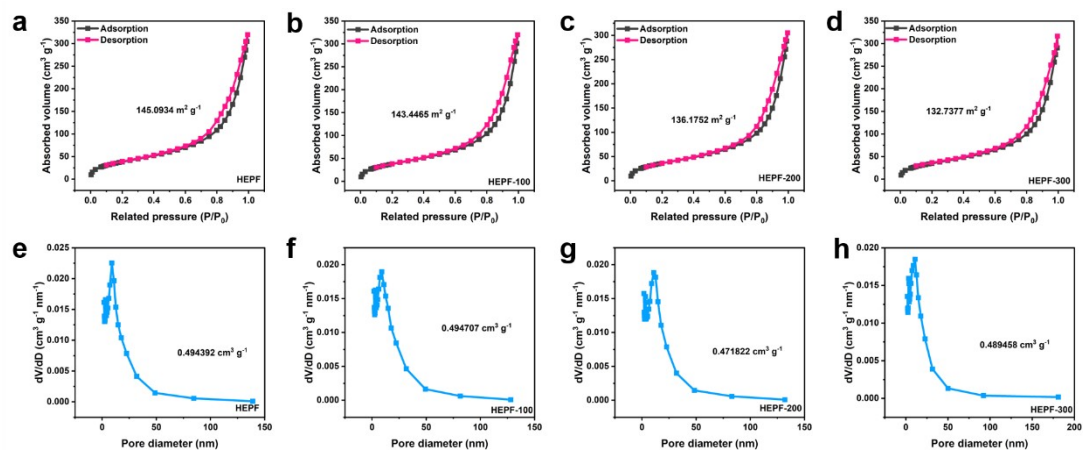

**Figure S7** (a) The XPS survey scan of HEPF, and HEPF-X (X=100, 200, 300). XPS spectra of (b) K 2p for HEPF, and HEPF-X (X=100, 200, 300). (c) XPS spectra of (b) N 1s for HEPF-X (X=100, 200, 300).

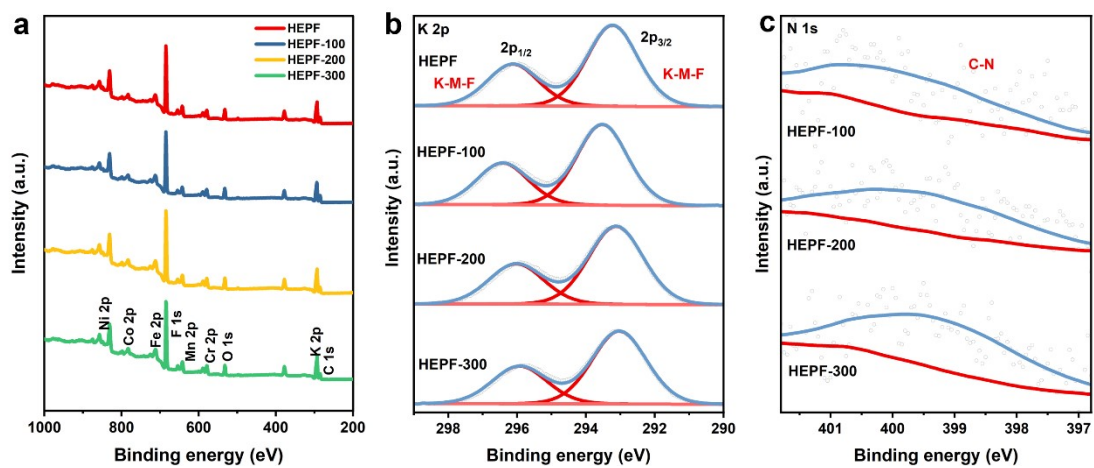



**Figure S8** XPS spectra of (a) Co 2p, (b) Cr 2p, (c) Fe 2p, (d) Mn 2p, (e) Ni 2p, and (f)

F 1s for HEPF-100 and HEPF-300.

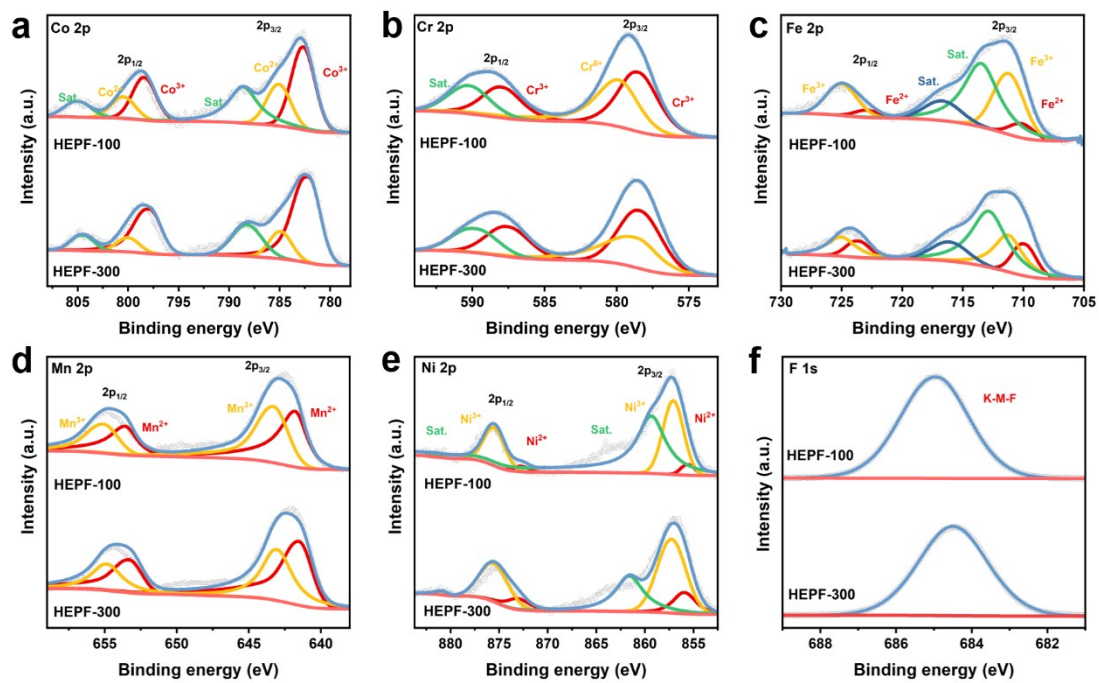

**Figure S9** CV measurements for  $C_{dl}$  of (a) HEPF, (b) HEPF-100, (c) HEPF-200, and (d) HEPF-300.

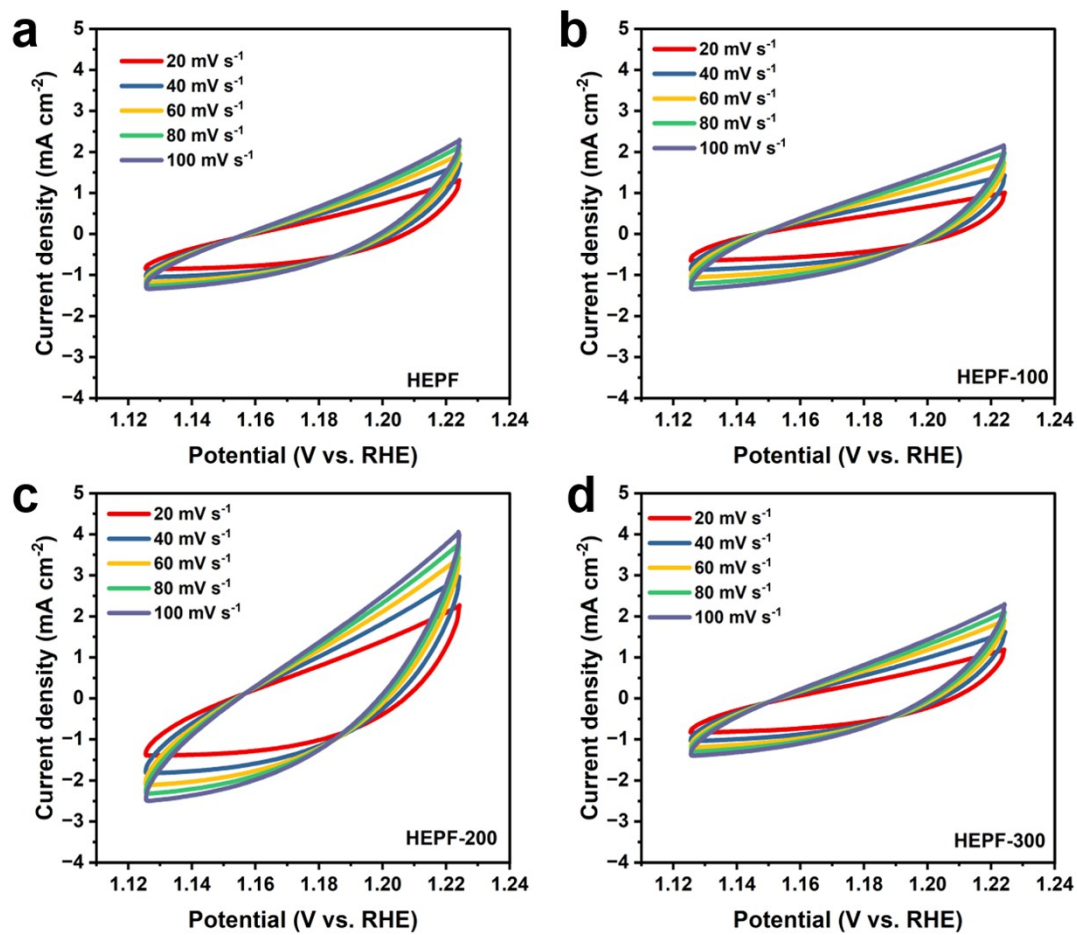

**Figure S10** The normalized LSV curves of HEPF, HEPF-100, HEPF-200, and HEPF-300 catalysts based on the ECSA.

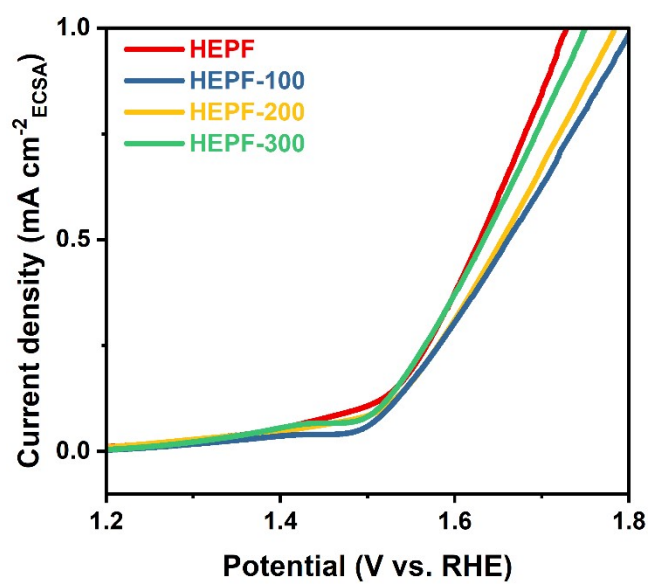

**Figure S11** (a) CVs of different samples in pH=7 phosphate buffer solution at a scan rate of 50 mV s<sup>-1</sup>. LSV curves normalized by (b) TOF.

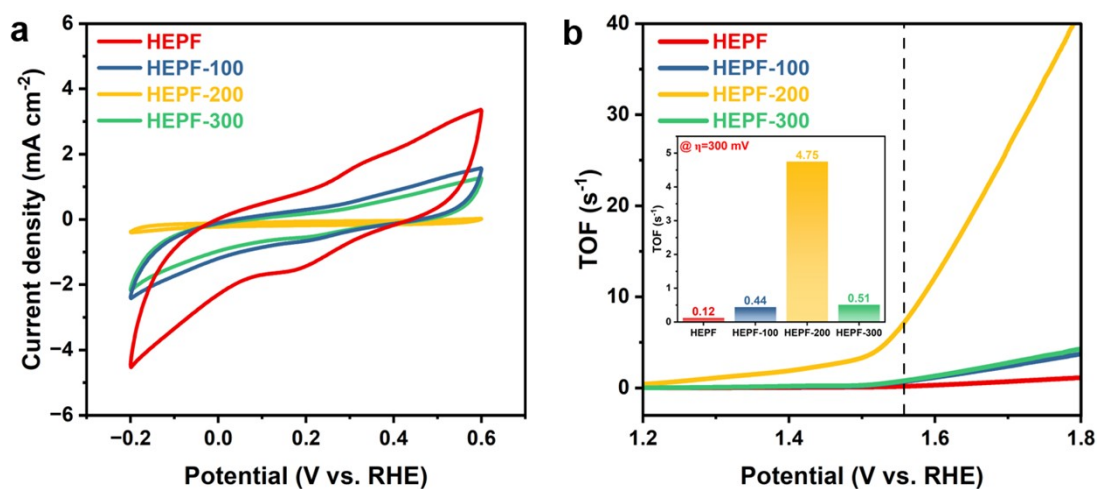

The absolute components of voltammetry charges (cathodic and anodic) were obtained from the CV curves at potentials of -0.2 V to 0.6 V vs. RHE in pH=7 phosphate buffer solution (PBS) at 50 mV s<sup>-1</sup>. The turnover frequency (TOF) was determined by the following equations:

$$n = Q/4F$$

$$\text{TOF} = I/4Fn$$

where I represent the current (A) during LSV measurements, Q refers to the number of voltammetry charges (C), n denotes the number of active sites (mol), and F is the Faraday constant (96500 C mol<sup>-1</sup>). The factor of 1/4 in the equations represents the four electrons needed to form one oxygen molecule from two oxygen atoms.

**Figure S12** Nyquist plots for (a) HEPF and (c) HEPF-200 at different applied potentials vs. RHE in 1 M KOH. Phase angle vs. log (frequency) plots of EIS data recorded at various voltages for (b) HEPF and (d) HEPF-200.

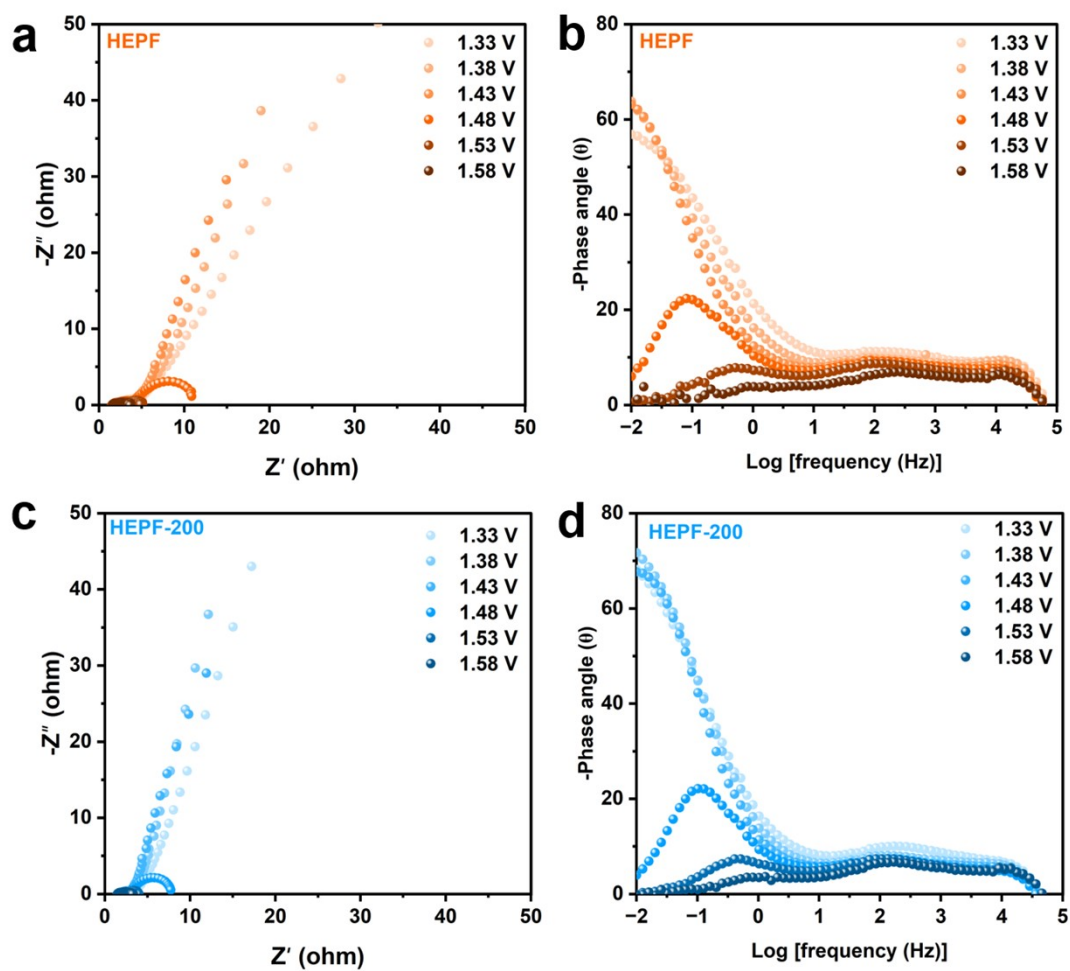

**Figure S13** XRD patterns of HEPF and HEPF-200 after the chronopotentiometry stability test.

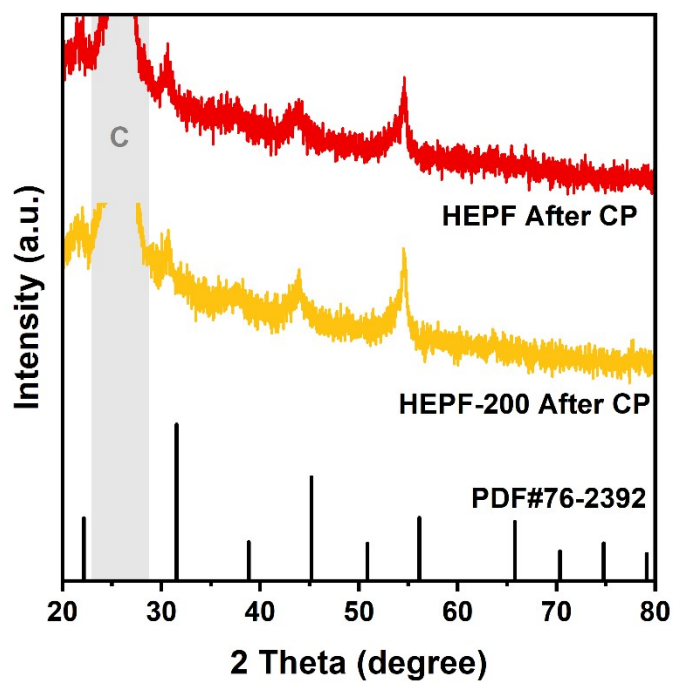

**Figure S14** (a) SEM image and (b) EDS mappings of HEPF-200 after the chronopotentiometry stability test.

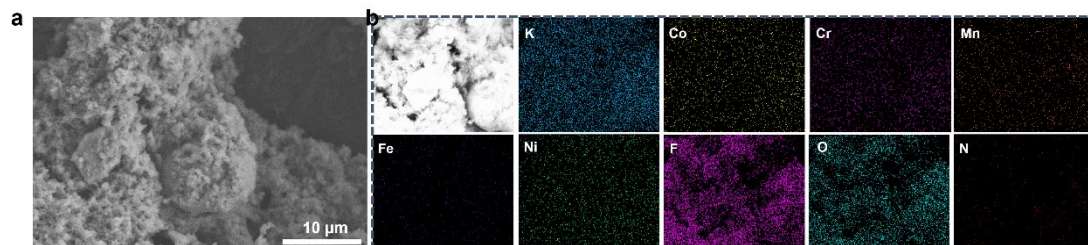

**Figure S15** Raman spectroscopy for HEPF and HEPF-200 after the chronopotentiometry stability test.

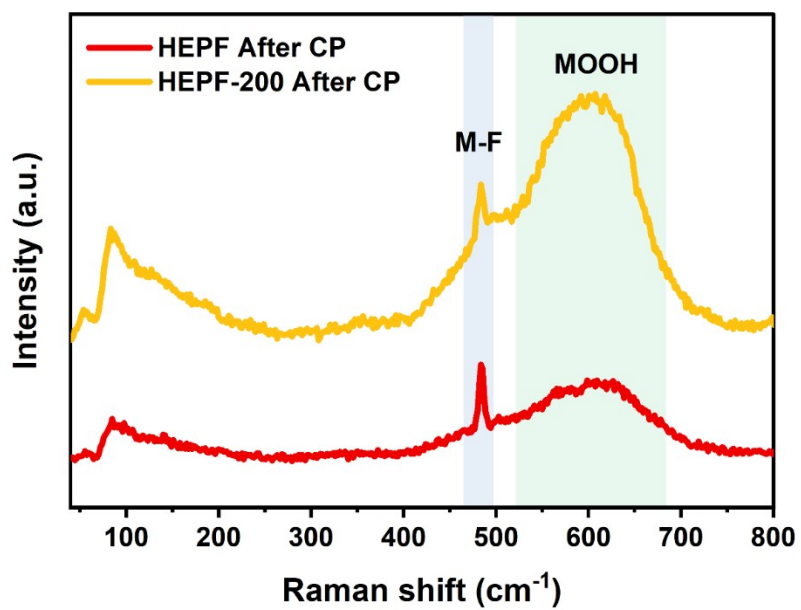



**Figure S16** Co 2p XPS spectra of (a) HEPF and (b) HEPF-200 at different CV cycles.

Cr 2p XPS spectra of (c) HEPF and (d) HEPF-200 at different CV cycles.

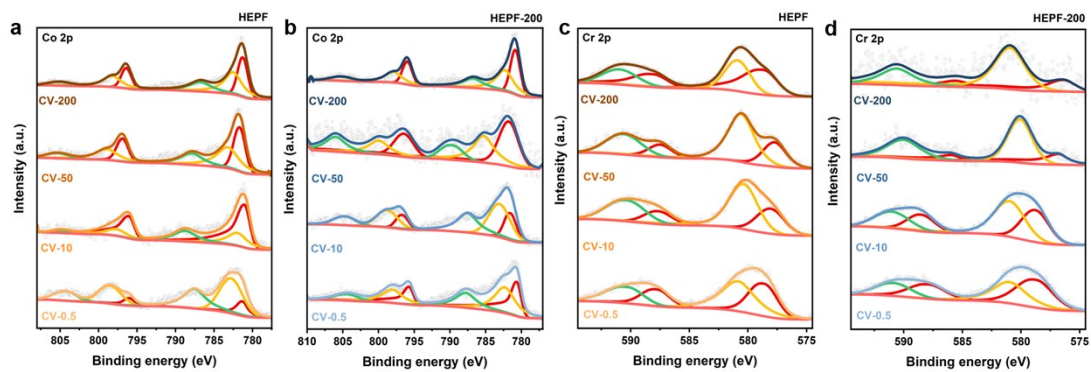

**Figure S17** XPS spectra measured at different CV cycles of O 1s for (a) HEPF and (b) HEPF-200 during the OER process.

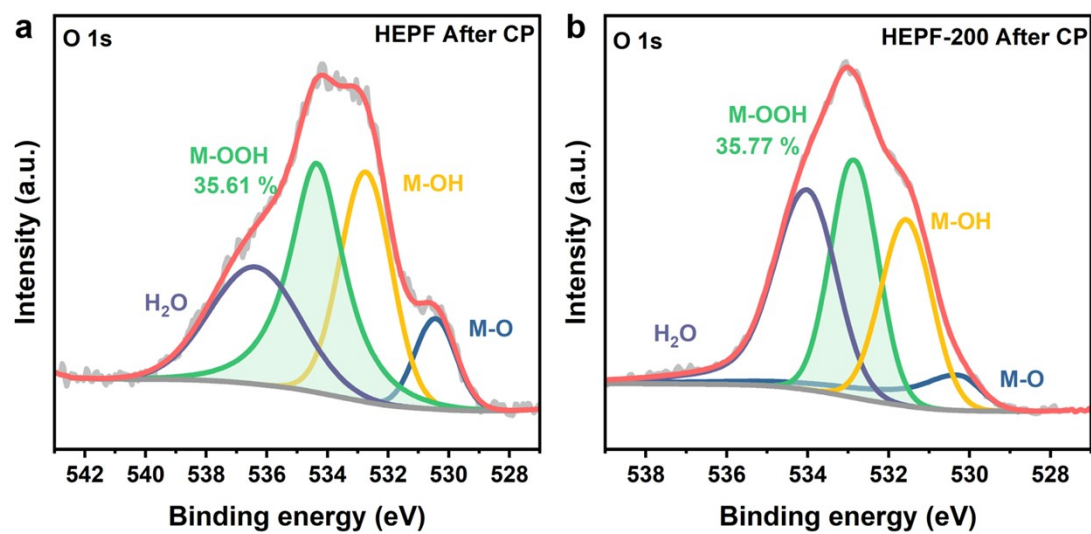

**Figure S18** XRD patterns of synthesized  $\text{K}(\text{CoMnFeNiCrZnMgAl})\text{F}_3$  and  $\text{K}(\text{CoMnFeNiCrZnMgAl})\text{F}_3\text{-PVP}$ .

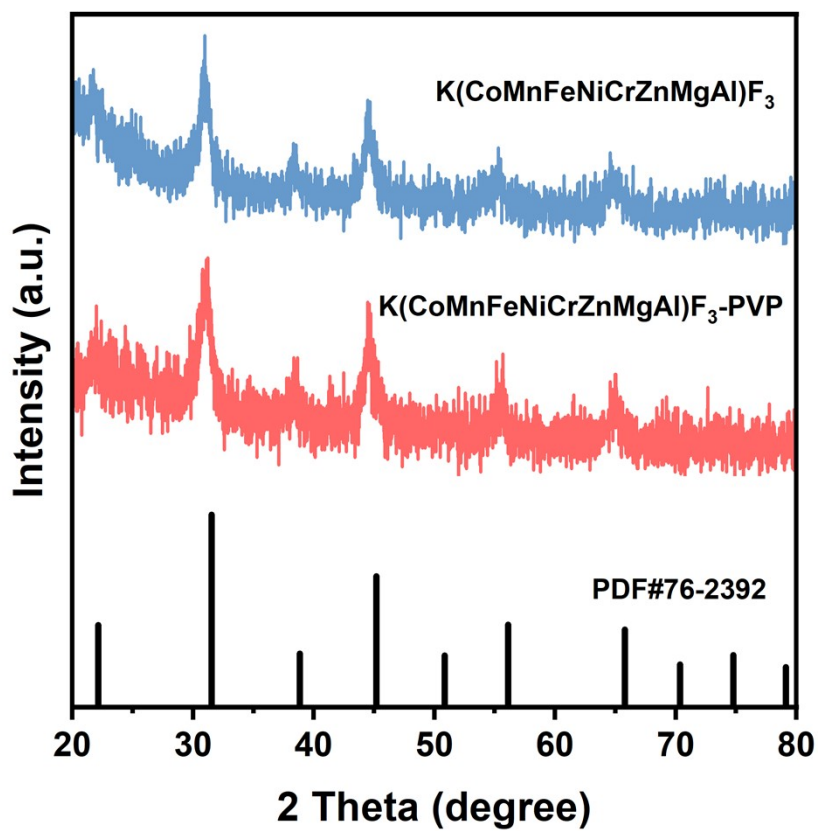

**Figure S19** XPS spectra of (a) Full spectra, (b) K 2p, (c) Co 2p, (d) Mn 2p, (e) Fe 2p, (f) Ni 2p, (g) Cr 2p, (h) Zn 2p, (i) Mg 2p, (j) Al 2p, and (k) F 1s for  $\text{K}(\text{CoMnFeNiCrZnMgAl})\text{F}_3$  and  $\text{K}(\text{CoMnFeNiCrZnMgAl})\text{F}_3\text{-PVP}$ . XPS spectra of (l) N for  $\text{K}(\text{CoMnFeNiCrZnMgAl})\text{F}_3\text{-PVP}$ .

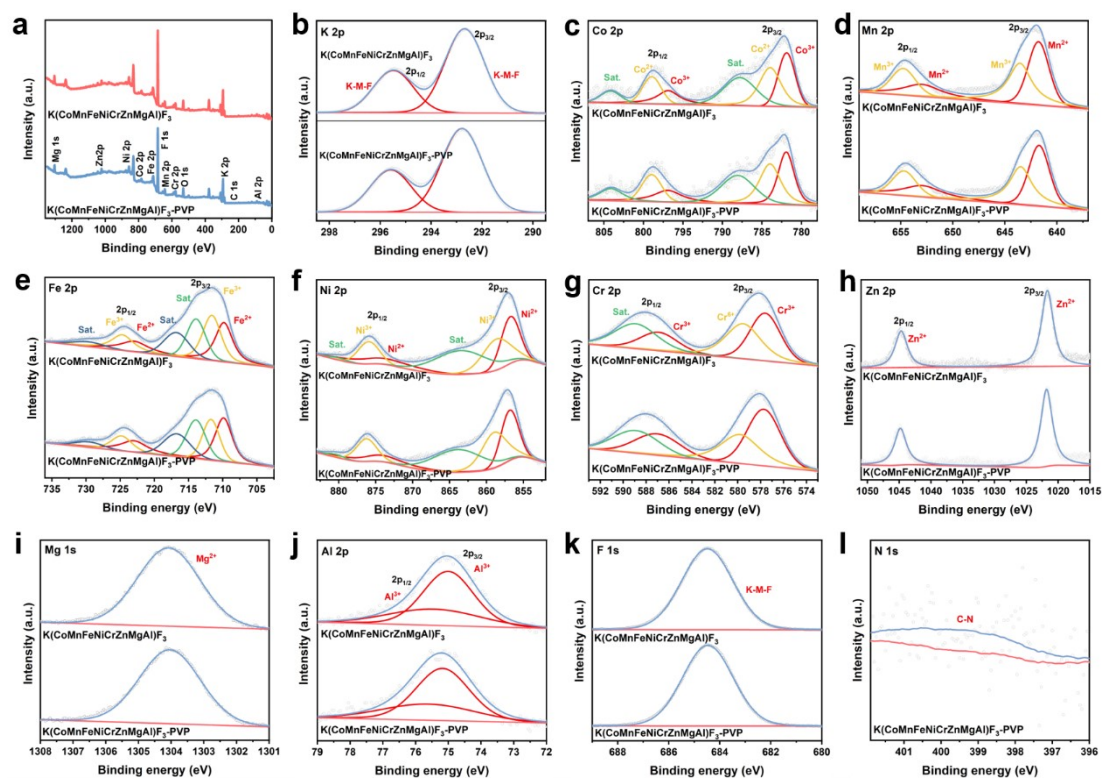

**Figure S20** SEM images of (a, b)  $\text{K}(\text{CoMnFeNiCrZnMgAl})\text{F}_3$ , and (c, d)  $\text{K}(\text{CoMnFeNiCrZnMgAl})\text{F}_3\text{-PVP}$ .

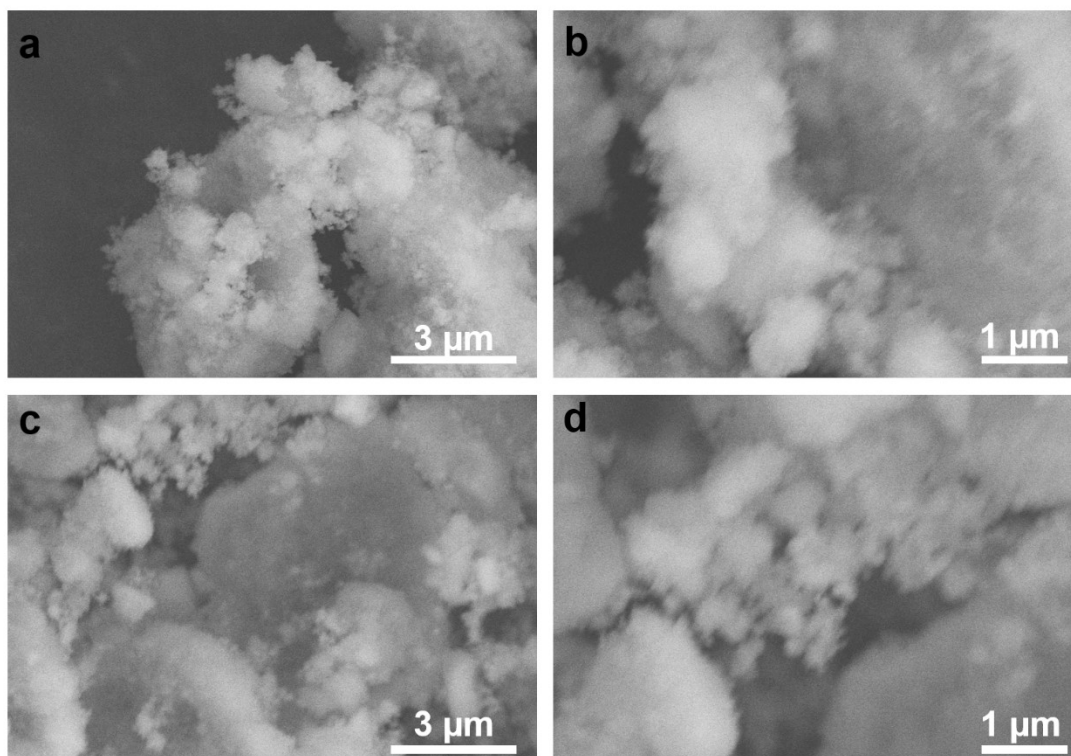

**Figure S21** EDS mappings of  $\text{K}(\text{CoMnFeNiCrZnMgAl})\text{F}_3$ .

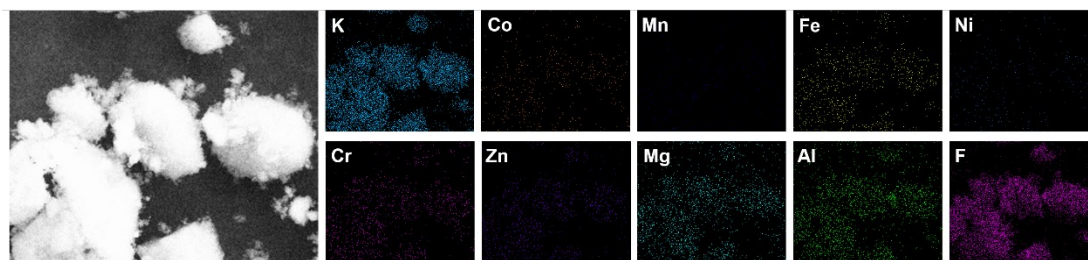

**Figure S22** EDS mappings of  $\text{K}(\text{CoMnFeNiCrZnMgAl})\text{F}_3\text{-PVP}$ .

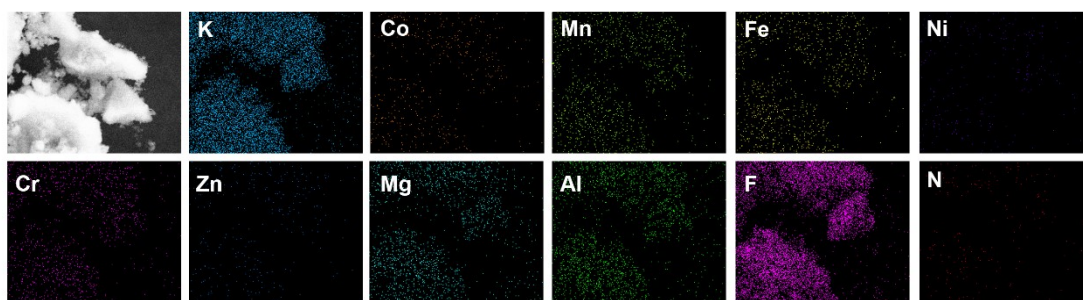

**Figure S23** Raman spectroscopy of  $\text{K}(\text{CoMnFeNiCrZnMgAl})\text{F}_3$  and  $\text{K}(\text{CoMnFeNiCrZnMgAl})\text{F}_3\text{-PVP}$ .

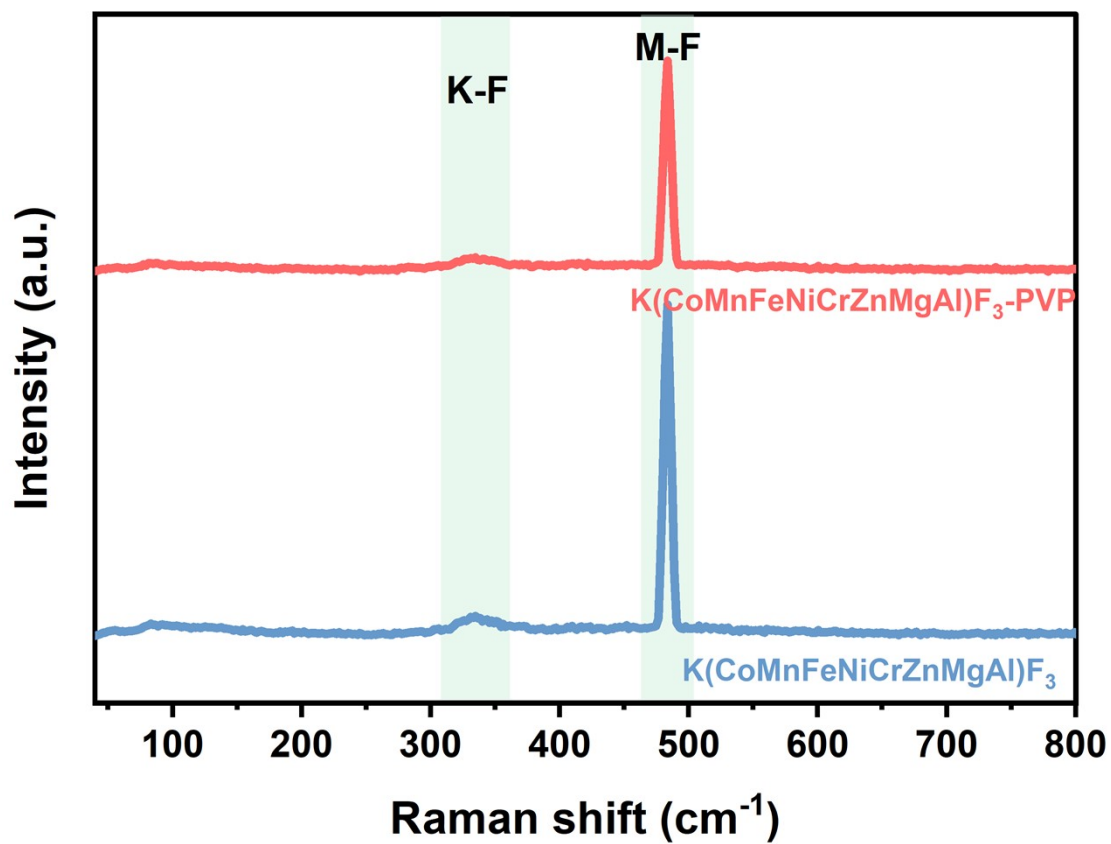



**Figure S24** (a) LSV curves, (b) EIS of different samples, and (c) Tafel slopes of  $\text{K}(\text{CoMnFeNiCrZnMgAl})\text{F}_3$  and  $\text{K}(\text{CoMnFeNiCrZnMgAl})\text{F}_3\text{-PVP}$ .

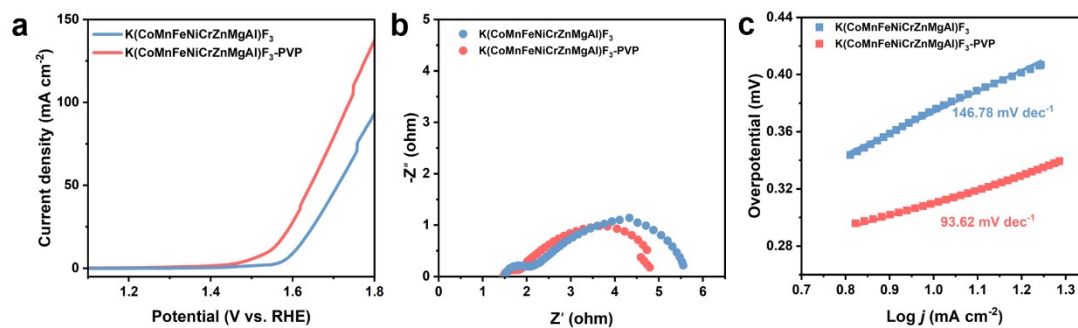

**Table S1** Chemical compositions of HEPF and HEPF-X.

| ID              | Co [%] | Mn [%] | Fe [%] | Ni [%] | Cr [%] |
|-----------------|--------|--------|--------|--------|--------|
| <b>HEPF</b>     | 18.6   | 19.2   | 21.5   | 20.4   | 20.3   |
| <b>HEPF-100</b> | 19.7   | 18.8   | 20.5   | 21.4   | 19.6   |
| <b>HEPF-200</b> | 20.7   | 17.9   | 21.4   | 19.2   | 21.4   |
| <b>HEPF-300</b> | 19.2   | 19.6   | 20.2   | 20.6   | 20.4   |

The chemical compositions of HEPF and HEPF-X were determined by inductively coupled plasma mass spectrometry (ICP-MS). As shown in Table S1, the mole fraction of each B-site element was estimated to about 0.2, indicating a molar ratio of the five metal elements at the B-site of 1:1:1:1:1.

Since the formation of high-entropy phases is mainly driven by high configurational entropy, it can be concluded that such high configurational entropy might have originated from multi-element mixing. The molar configuration entropy of HEPF was calculated following equation:

$$S = -R \sum_{i=1}^N x_i \ln x_i$$

where R is the ideal gas constant and  $x_i$  is the mole fraction of the corresponding element. The molar configuration entropy was greater than 1.5 R, further proving the high-entropy nature of the synthesized HEPF material.

**Table S2** The BET specific surface area and BJH pore size of different catalysts.

|                 | <b>Surface Area (m<sup>2</sup> g<sup>-1</sup>)</b> | <b>Pore Size (cm<sup>3</sup> g<sup>-1</sup>)</b> |
|-----------------|----------------------------------------------------|--------------------------------------------------|
| <b>HEPF</b>     | 145.09                                             | 0.49                                             |
| <b>HEPF-100</b> | 143.45                                             | 0.49                                             |
| <b>HEPF-200</b> | 136.18                                             | 0.47                                             |
| <b>HEPF-300</b> | 132.74                                             | 0.49                                             |

**Table S3** The ratios of  $\text{Co}^{3+}/\text{Co}^{2+}$  in HEPF and HEPF-200.

|                 | $\text{Co}^{3+}/\text{Co}^{2+}$ |
|-----------------|---------------------------------|
| <b>HEPF</b>     | 2.49                            |
| <b>HEPF-200</b> | 1.93                            |

**Table S4** C-N binding energy in the N 1s XPS spectrum of HEPF-X (X = 100, 200, 300).

| <b>Samples</b>           | <b>HEPF-100</b> | <b>HEPF-200</b> | <b>HEPF-300</b> |
|--------------------------|-----------------|-----------------|-----------------|
| <b>Binding energy/eV</b> | 399.90          | 399.50          | 399.24          |

**Table S5** The calculation process of ECSA of HEPF, and HEPF-X (X=100, 200, 300).

| <b>Samples</b>  | <b>C<sub>dl</sub> (mF cm<sup>-2</sup>)</b> | <b>C<sub>s</sub> (mF cm<sup>-2</sup>)</b> | <b>ECSA</b> |
|-----------------|--------------------------------------------|-------------------------------------------|-------------|
| <b>HEPF</b>     | 2.29                                       | 0.04                                      | 57.25       |
| <b>HEPF-100</b> | 4.72                                       |                                           | 118         |
| <b>HEPF-200</b> | 5.63                                       |                                           | 140.75      |
| <b>HEPF-300</b> | 3.41                                       |                                           | 85.25       |

**Table S6** Comparison of overpotential with other OER catalysts.

| <b>Samples</b>                                                                  | <b>Overpotential (mV)</b> | <b>Catalyst loading amount</b> | <b>Ref.</b> |
|---------------------------------------------------------------------------------|---------------------------|--------------------------------|-------------|
| <b>K(MgMnFeCoNi)F<sub>3</sub></b>                                               | 397                       | 0.7 mg cm <sup>-2</sup>        | [1]         |
| <b>[LaM(III)O<sub>3</sub>]<sub>3/4</sub>[KM(II)F<sub>3</sub>]<sub>1/4</sub></b> | 345                       | 0.7 mg cm <sup>-2</sup>        | [2]         |
| <b>NaCo<sub>1-2x</sub>Fe<sub>x</sub>Ni<sub>x</sub>F<sub>3</sub></b>             | 265                       | 0.35 mg cm <sup>-2</sup>       | [3]         |
| <b>KNi<sub>0.8</sub>Co<sub>0.2</sub>F<sub>3</sub></b>                           | 310                       | 0.7 mg cm <sup>-2</sup>        | [4]         |
| <b>(NH<sub>4</sub>)<sub>3</sub>Fe<sub>x</sub>Co<sub>1-x</sub>F<sub>6</sub></b>  | 243                       | 0.2 mg cm <sup>-2</sup>        | [5]         |
| <b>HEPF-200</b>                                                                 | 242                       | 0.5 mg cm <sup>-2</sup>        | This work   |

**Table S7** EIS data of HEPF and HEPF-X (X = 100, 200, 300).

|                 | <b><math>R_s</math> (<math>\Omega</math>)</b> | <b><math>R_{ct}</math> (<math>\Omega</math>)</b> |
|-----------------|-----------------------------------------------|--------------------------------------------------|
| <b>HEPF</b>     | 1.68                                          | 5.85                                             |
| <b>HEPF-100</b> | 1.63                                          | 3.91                                             |
| <b>HEPF-200</b> | 1.43                                          | 2.97                                             |
| <b>HEPF-300</b> | 1.48                                          | 4.44                                             |



**Table S8** The contents of ion in electrolyte after CV activation from the ICP results.

| <b>Samples</b>  | <b>Co</b>   | <b>Mn</b>   | <b>Fe</b>   | <b>Ni</b>   | <b>Cr</b>   |
|-----------------|-------------|-------------|-------------|-------------|-------------|
| <b>HEPF</b>     | 0.0038 mg/L | 0.0071 mg/L | 0.0053 mg/L | 0.0079 mg/L | 0.0042 mg/L |
| <b>HEPF-200</b> | 0.0021 mg/L | 0.0095 mg/L | 0.0114 mg/L | 0.0071 mg/L | 0.0138 mg/L |

**Table S9** Chemical compositions of  $\text{K}(\text{CoMnFeNiCrZnMgAl})\text{F}_3$  and  $\text{K}(\text{CoMnFeNiCrZnMgAl})\text{F}_3\text{-PVP}$ .

|                                                                            | <b>Co</b> | <b>Mn</b> | <b>Fe</b> | <b>Ni</b> | <b>Cr</b> | <b>Zn</b> | <b>Mg</b> | <b>Al</b> |
|----------------------------------------------------------------------------|-----------|-----------|-----------|-----------|-----------|-----------|-----------|-----------|
| <b><math>\text{K}(\text{CoMnFeNiCrZnMgAl})\text{F}_3</math></b>            | 11.3%     | 13.2%     | 11.5%     | 12.4%     | 11.9%     | 12.7%     | 13.4%     | 13.6%     |
| <b><math>\text{K}(\text{CoMnFeNiCrZnMgAl})\text{F}_3\text{-PVP}</math></b> | 13.8%     | 12.6%     | 14.3%     | 12.9%     | 11.5%     | 12.7%     | 11.8%     | 10.4%     |

**Table S10** EIS data of  $\text{K}(\text{CoMnFeNiCrZnMgAl})\text{F}_3$  and  $\text{K}(\text{CoMnFeNiCrZnMgAl})\text{F}_3$ -PVP.

|                                                    | $R_s$ ( $\Omega$ ) | $R_{ct}$ ( $\Omega$ ) |
|----------------------------------------------------|--------------------|-----------------------|
| $\text{K}(\text{CoMnFeNiCrZnMgAl})\text{F}_3$      | 1.51               | 5,71                  |
| $\text{K}(\text{CoMnFeNiCrZnMgAl})\text{F}_3$ -PVP | 1.46               | 4.92                  |

## References

- [1] T. Wang, H. Chen, Z. Yang, J. Liang, S. Dai, *Journal of the American Chemical Society* **2020**, *142*, 4550-4554.
- [2] T. Wang, J. Fan, C.-L. Do-Thanh, X. Suo, Z. Yang, H. Chen, Y. Yuan, H. Lyu, S. Yang, S. Dai, *Angewandte Chemie-International Edition* **2021**, *60*, 9953-9958.
- [3] H. Yao, Y. Zheng, S. Yue, S. Hu, W. Yuan, X. Guo, *Inorganic Chemistry Frontiers* **2023**, *10*, 804-814.
- [4] S. G. Chandrappa, P. Moni, D. Chen, G. Karkera, K. R. Prakasha, R. A. Caruso, A. S. Prakash, *ACS Applied Energy Materials* **2021**, *4*, 13425-13430.
- [5] Y. Li, J. Li, X. Zhai, Y. Liu, G. Wang, X. Yang, G. Ge, *ACS Applied Energy Materials* **2022**, *5*, 13981-13989.
